# Supplementary material for: A digital archive of human activity in the McMurdo Dry Valleys, Antarctica
Source: Copernicus journal article supplement (doi:10.5194/essd-12-1117-2020), 2020-05-13
Supplement: Supplementary file 1 [file essd-12-1117-2020-supplement.zip]

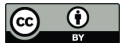

## *Supplement of*

# **A digital archive of human activity in the McMurdo Dry Valleys, Antarctica**

**Adrian Howkins et al.**

*Correspondence to:* Adrian Howkins ([adrian.howkins@bristol.ac.uk](mailto:adrian.howkins@bristol.ac.uk))

- [essd-12-1117-2020-supplement-title-page.pdf](#)
- [Table S1.xlsx](#)

The copyright of individual parts of the supplement might differ from the CC BY 4.0 License.
